# Supplementary material for: Nanocomposites from natural templates based on fatty compound-functionalised siloxanes
Source: Royal Society of Chemistry journal article supplement (doi:10.1039/b906448f), 2009-01-01
Supplement: b906448f.pdf [file b906448f.pdf]

## Nanocomposites from Natural Templates based on Fatty Compound-Functionalised Siloxanes

Abdelkrim El Kadib<sup>a,c,\*</sup>, Nadia Katir<sup>b</sup>, Nathalie Marcotte<sup>a</sup>, Karine Molvinger<sup>a</sup>, Annie Castel<sup>b</sup>, Pierre Rivière<sup>b</sup>, and Daniel Brunel<sup>a\*</sup>

### Supplementary Information

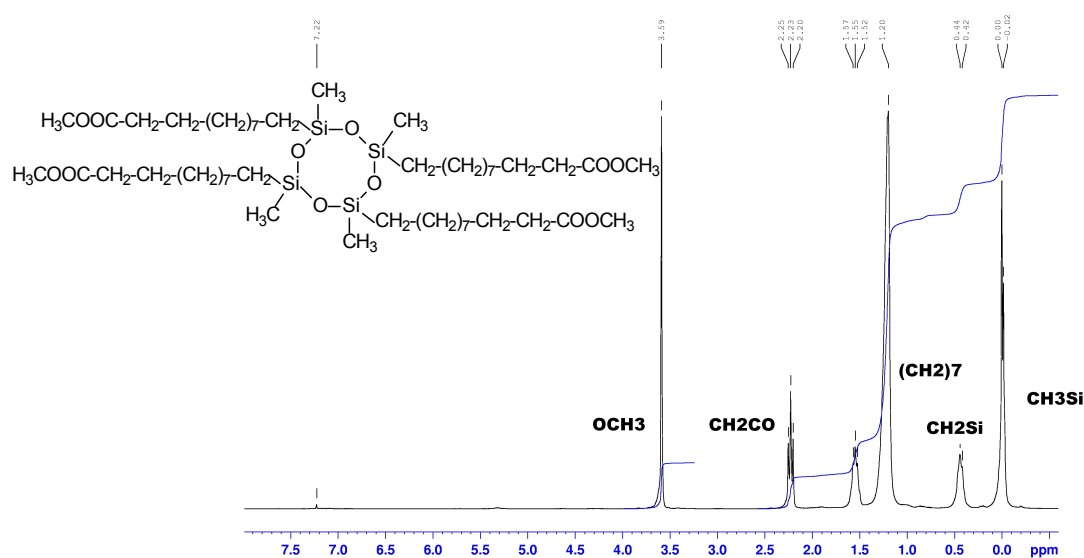

Figure S<sub>1</sub>.  $^1H$  NMR of  $P_2$

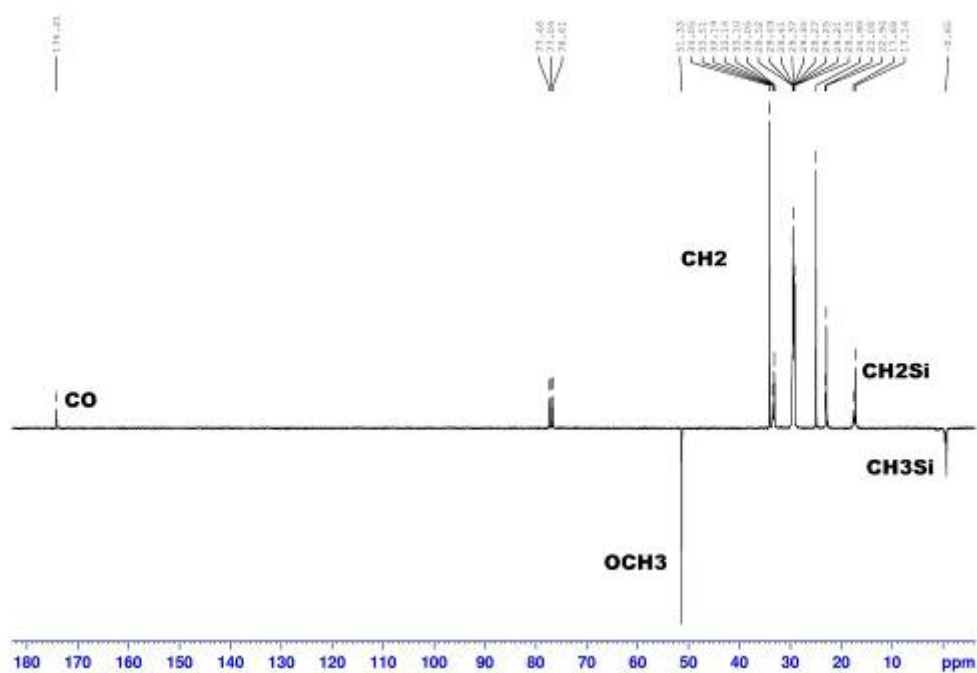

Figure S<sub>2</sub> :  $^{13}C$  NMR of  $P_2$

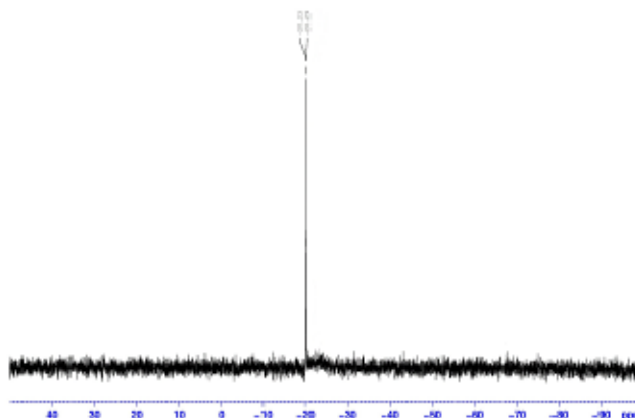

**Figure S3.**  $^{29}\text{Si}$  NMR of  $\text{P}_2$

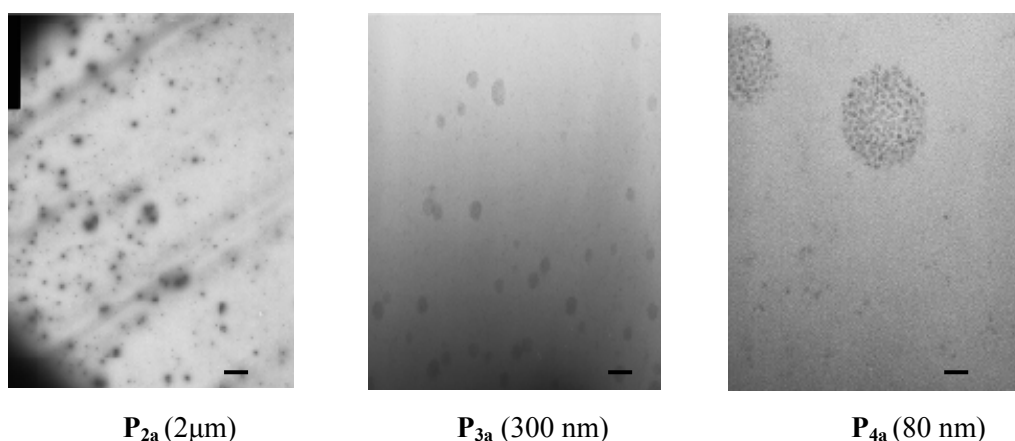

**Figure S4.** TEM images of fatty acid functionalised siloxane  $\text{P}_{2a}$ ,  $\text{P}_{3a}$ ,  $\text{P}_{4a}$  in ethanol, that of  $\text{P}_{1a}$  being shown in the manuscript.  
(Scale bars are indicated between brackets),

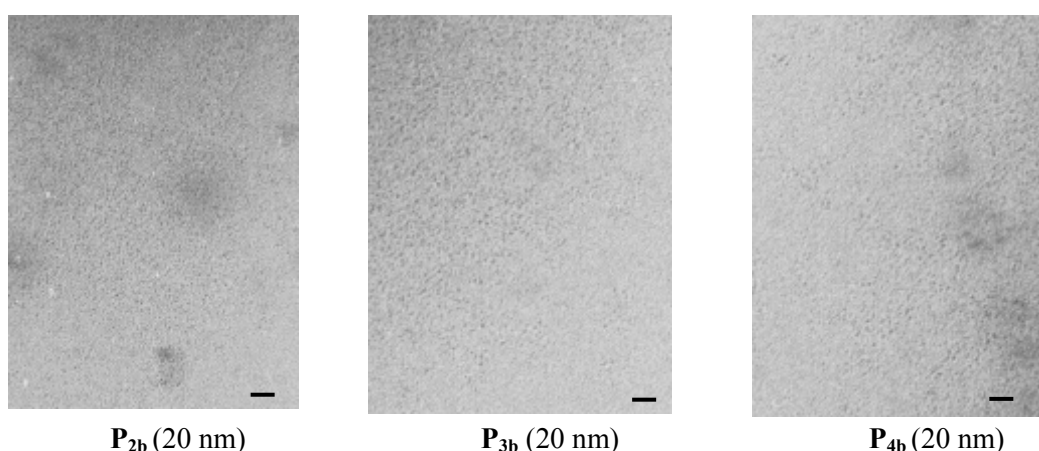

**Figure S5.** . TEM images of fatty acid functionalised siloxane  $\text{P}_{2b}$ ,  $\text{P}_{3b}$ ,  $\text{P}_{4b}$  in heptane, that of  $\text{P}_{1b}$  being shown in the manuscript  
(Scale bars are indicated between brackets)

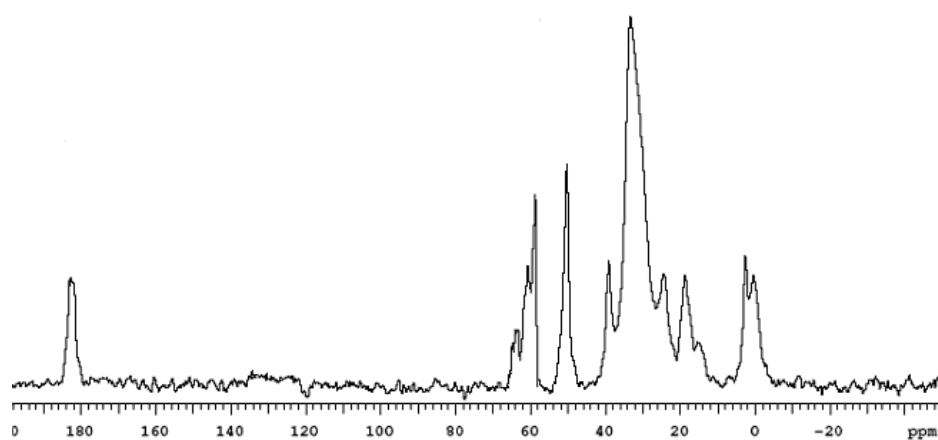

**Figure S<sub>6</sub>.**  $^{13}\text{C}$  CP MAS NMR of **M2b**.

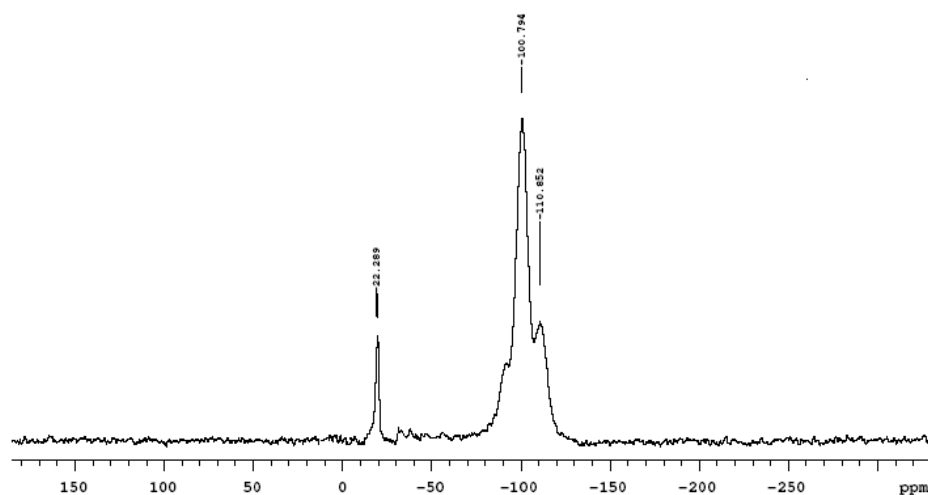

**Figure S<sub>7</sub>.**  $^{29}\text{Si}$  CP MAS NMR of **M2b**

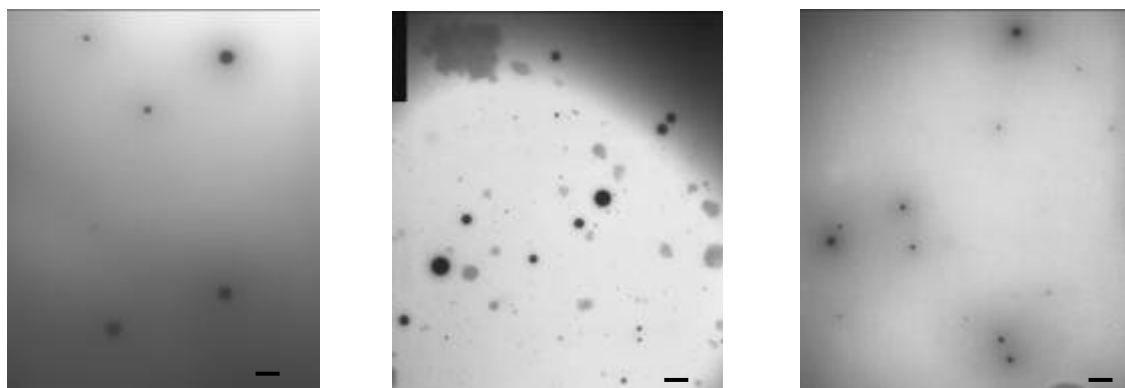

**M2a** (200 nm)

**M3a** (400 nm)

**M4a** (2  $\mu$ m)

**Figure S<sub>8</sub>.** TEM images of hybrid materials obtained from fatty acid functionalised siloxane **P<sub>2a</sub>**, **P<sub>3a</sub>**, **P<sub>4a</sub>**, in ethanol and acid conditions in presence of TEOS, that of **M1a** from **P<sub>1a</sub>** being shown in the manuscript

(Scale bares are indicated between brackets)

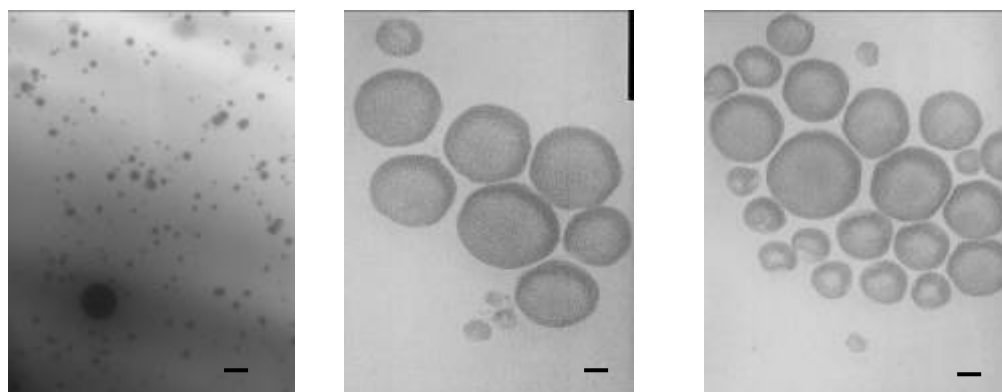

**M2b** (1  $\mu$ m)

**M3b** (50 nm)

**M4b** (100 nm)

**Figure S<sub>9</sub>.** TEM images of hybrid materials obtained from fatty acid functionalised siloxane **P<sub>2a</sub>**, **P<sub>3a</sub>**, **P<sub>4a</sub>**, in ethanol and basic conditions in presence of TEOS, that of **M1b** from **P<sub>1a</sub>** being shown in the manuscript

(Scale bares are indicated between brackets)

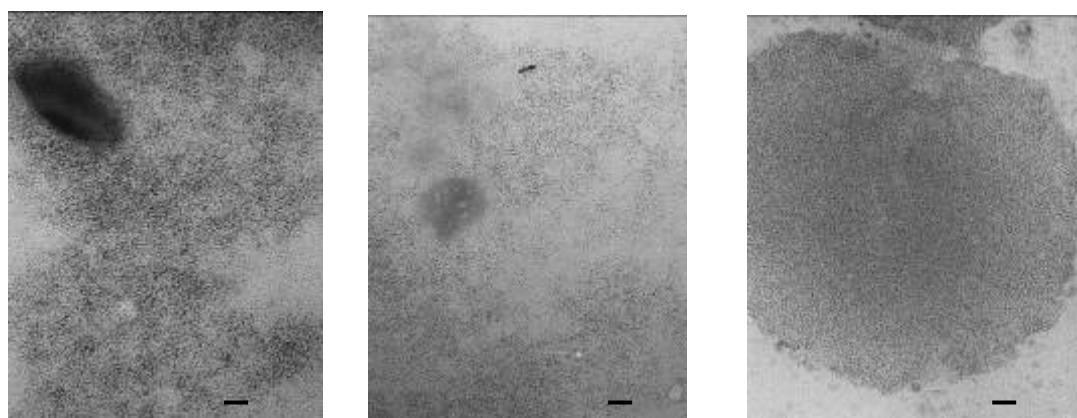

**M2c** (10 nm)

**M3c** (10 nm)

**M4c** (10 nm)

**Figure S<sub>10</sub>.** TEM images of hybrid materials obtained from fatty acid functionalised siloxane **P<sub>2b</sub>**, **P<sub>3b</sub>**, **P<sub>4b</sub>**, in heptane and in presence of TEOS, that of **M1c** from **P<sub>1b</sub>** being shown in the manuscript

(Scale bares are indicated between brackets)

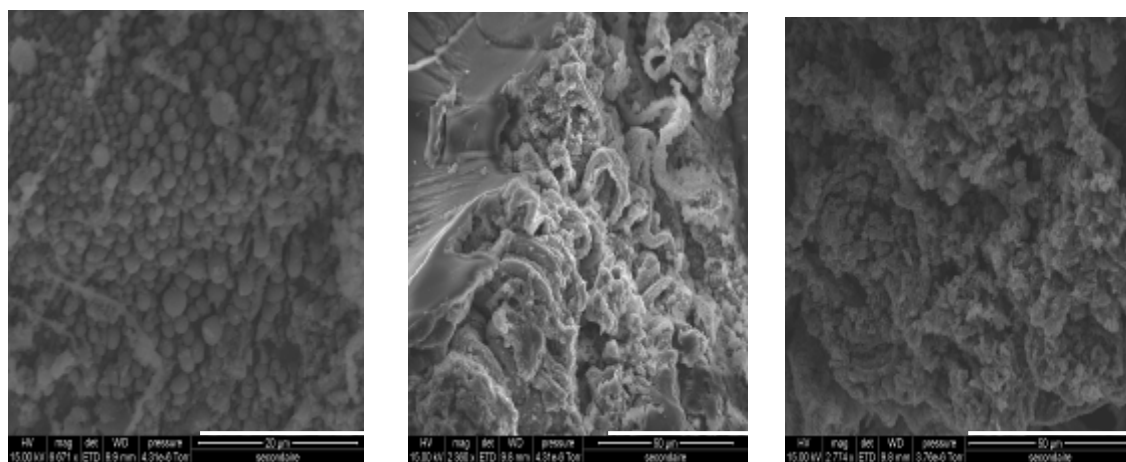

**M2a (20µm)**

**M3a(50µm)**

**M4a (50µm)**

**Figure S11.** SEM images of hybrid materials obtained from fatty acid functionalised siloxane **P<sub>2a</sub>**, **P<sub>3a</sub>**, **P<sub>4a</sub>**, in ethanol and acid conditions in presence of TEOS, that of **M1a** from **P<sub>1a</sub>** being shown in the manuscript

(Scale bares are indicated between brackets)

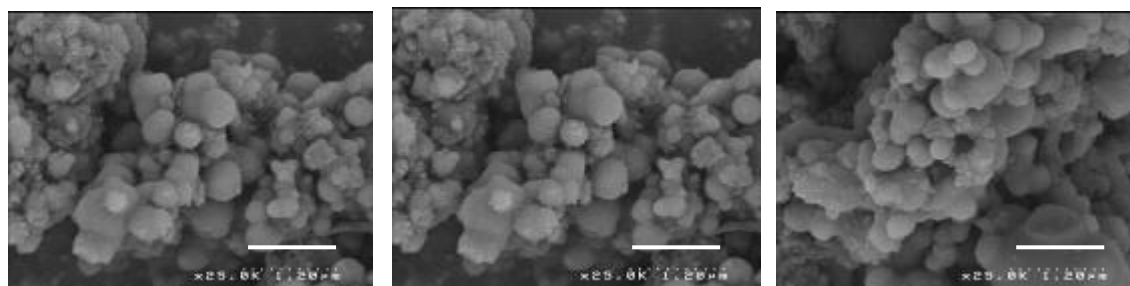

**M2b (1.20µm)**

**M3b (1.20µm)**

**M4b (2.00µm)**

**Figure S12.** SEM images of hybrid materials obtained from fatty acid functionalised siloxane **P<sub>2a</sub>**, **P<sub>3a</sub>**, **P<sub>4a</sub>**, in ethanol and basic conditions in presence of TEOS, that of **M1b** from **P<sub>1a</sub>** being shown in the manuscript

(Scale bares are indicated between brackets)

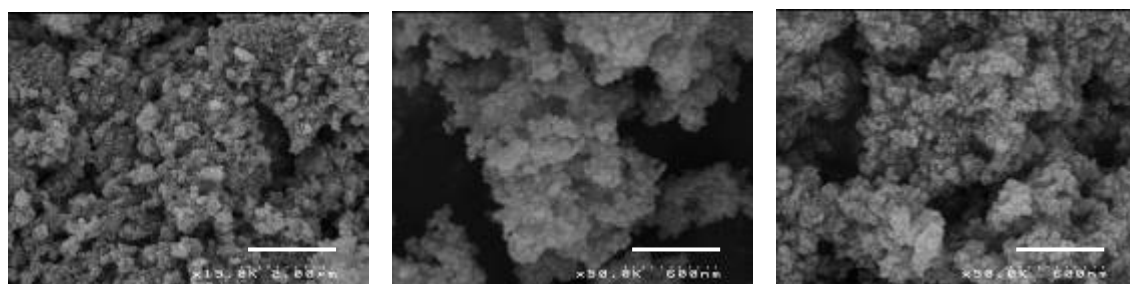

**M2c (2.00µm)**

**M3c (600nm)**

**M4c (600nm)**

**Figure S13.** SEM images of hybrid materials obtained from fatty acid functionalised siloxane **P<sub>2b</sub>**, **P<sub>3b</sub>**, **P<sub>4b</sub>**, in heptane and in presence of TEOS, that of **M1c** from **P<sub>1b</sub>** being shown in the manuscript

(Scale bares are indicated between brackets)

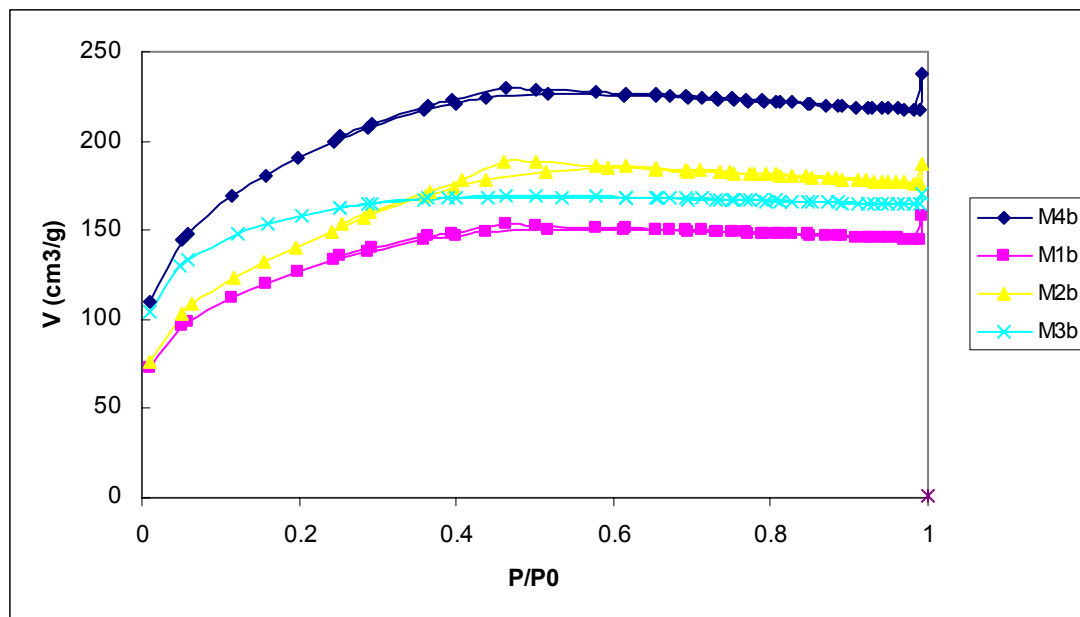

Figure S<sub>14</sub> . Nitrogen adsorption desorption of hybrid materials prepared under basic conditions
